# Supplementary material for: Lessons on Conditional Gene Targeting in Mouse Adipose Tissue
Source: PubMed Central journal article supplement — Diabetes. 2013 Feb 14;62(3):864–74. doi: 10.2337/db12-1089 (PMC3581196; doi:10.2337/db12-1089), 2013-02-14

## SUPPLEMENTARY DATA

**Supplementary Figure 1.** Tissues Negative for X-gal Staining in aP2-Cre<sup>BI</sup> R26R-lacZ Mice. Representative X-gal stained tissue sections from aP2-Cre<sup>BI</sup> R26R-lacZ mice. Liver, kidney, brain, thymus, adrenal, pancreas, spleen, salivary gland, uterus, ovary, and skin, from 3 month old chow fed aP2-Cre<sup>BI</sup> R26R-lacZ (n=4) were embedded in OCT; 10  $\mu$ m frozen sections were X-gal stained, and counterstained with nuclear fast red. Representative images are shown.

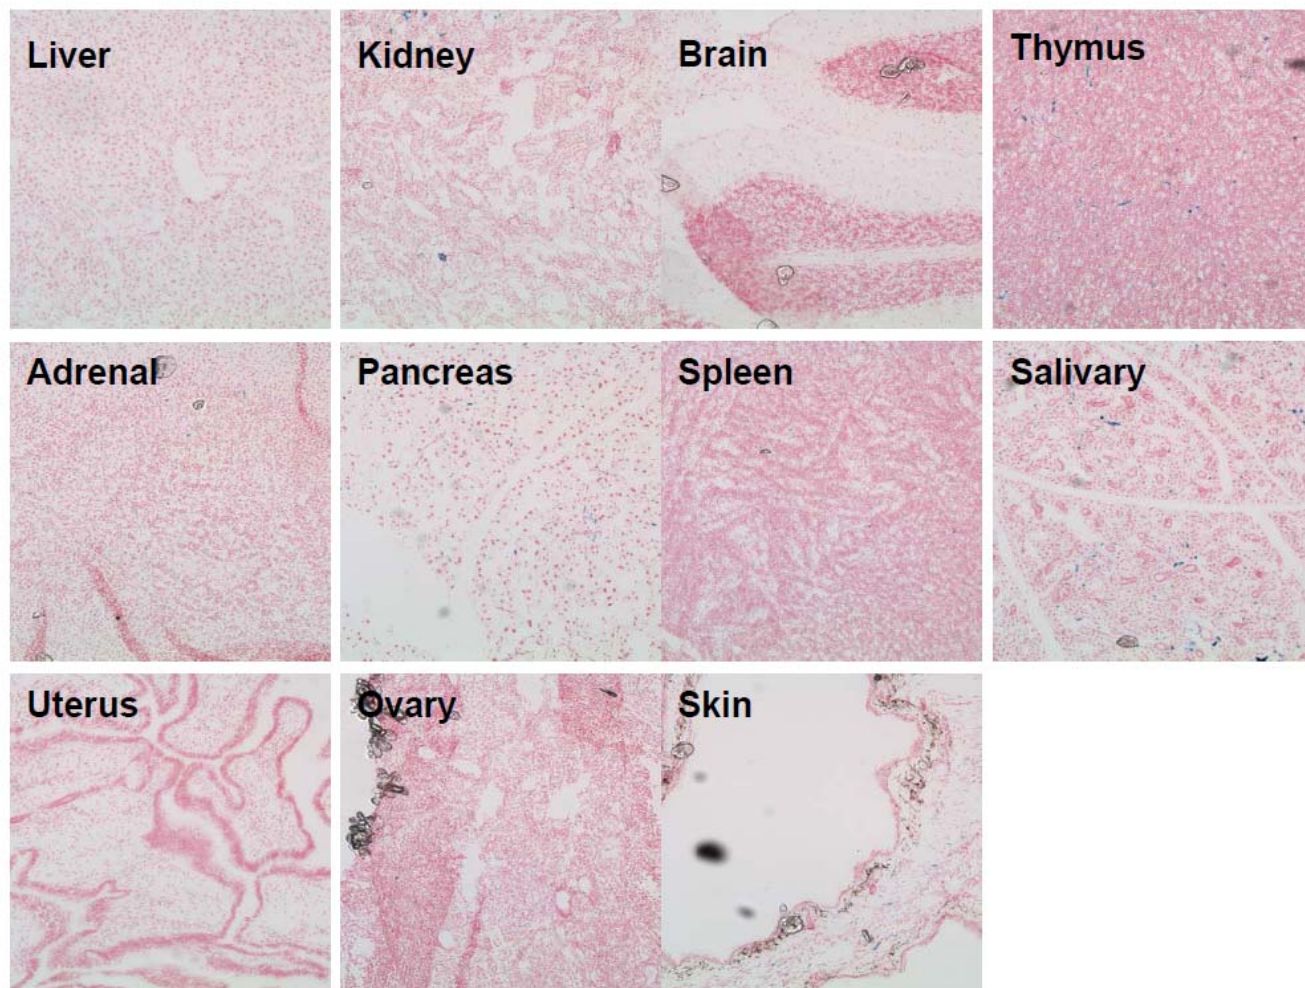

SUPPLEMENTARY DATA

**Supplementary Figure 2.** Expression Analysis of Fabp4 and Adiponectin mRNA in Wild-Type Mice Tissues. Expression of Fabp4 and Adiponectin mRNA was analyzed by qPCR in tissues of chow diet fed 8 week-old male C57BL/6 mice (n=3). Ovary and uterus were taken from chow diet fed 8 week-old female C57BL/6 mice (n=3). Mice were perfused with PBS prior to sacrifice. Data are normalized to the expression of Tbp and are shown as mean  $\pm$  SEM.

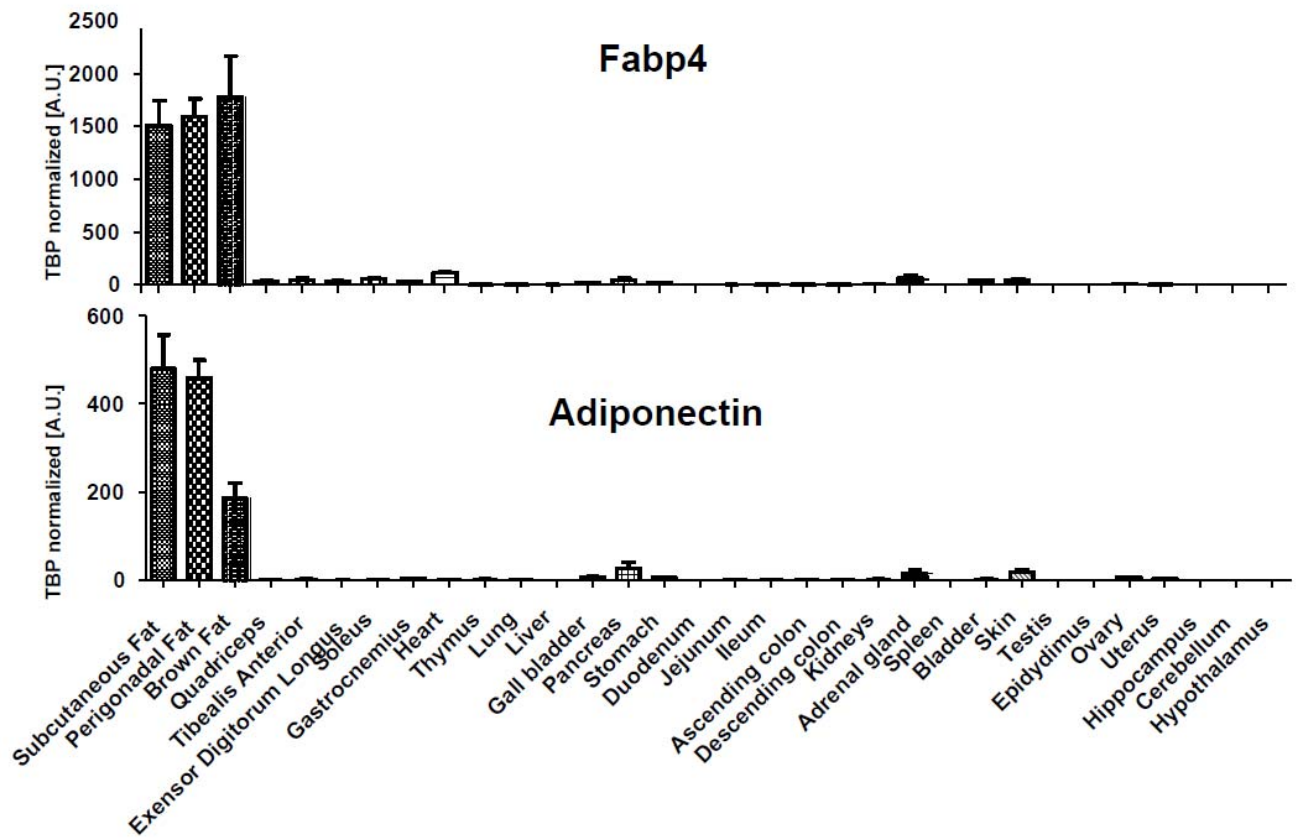

## SUPPLEMENTARY DATA

**Supplementary Figure 3.** Tissues Negative for X-gal Staining in aP2-CreERT2 R26R-lacZ Mice After Vehicle Treatment. Representative X-gal stained tissues sections from aP2-CreERT2 R26R-lacZ mice after vehicle treatment. Liver, kidney, brain, thymus, adrenal, pancreas, spleen, lung, testis, skin, and prostate from 4 month old chow fed aP2-CreERT2 R26R-lacZ (n=3) were embedded in OCT; 10  $\mu$ m frozen sections were X-gal stained, and counterstained with nuclear fast red. Representative images are shown.

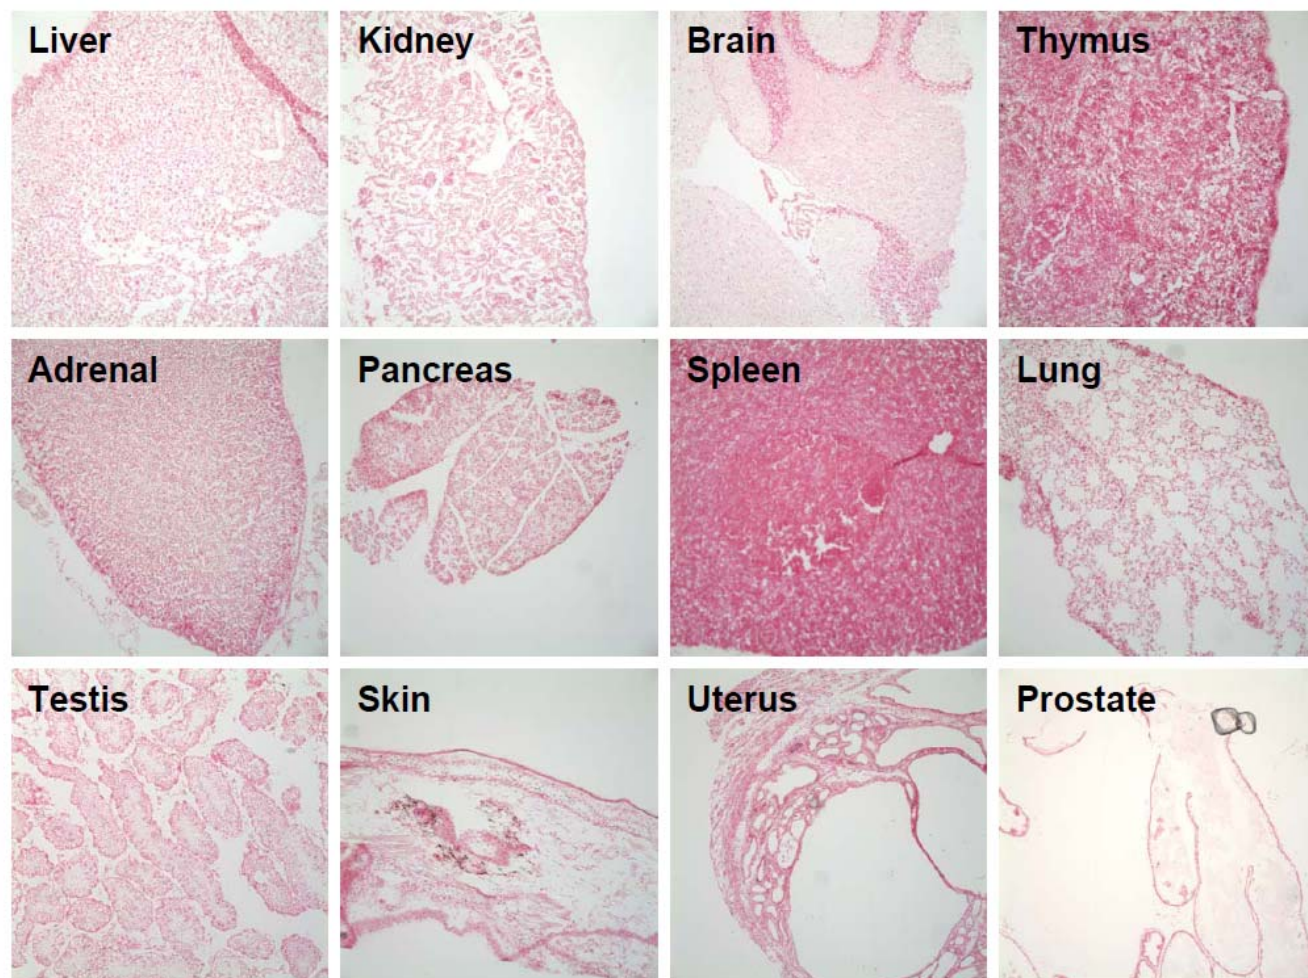

## SUPPLEMENTARY DATA

**Supplementary Figure 4.** Tissues Negative for X-gal Staining in aP2-CreERT2 R26R-lacZ Mice After Tamoxifen Treatment . Representative X-gal stained tissues sections from aP2-CreERT2 R26R-lacZ mice after tamoxifen treatment. Liver, kidney, brain, thymus, adrenal, pancreas, spleen, lung, testis, skin, and prostate from 4 month old chow fed aP2-CreERT2 R26R-lacZ (n=3) were embedded in OCT; 10  $\mu$ m frozen sections were X-gal stained, and counterstained with nuclear fast red. Representative images are shown.

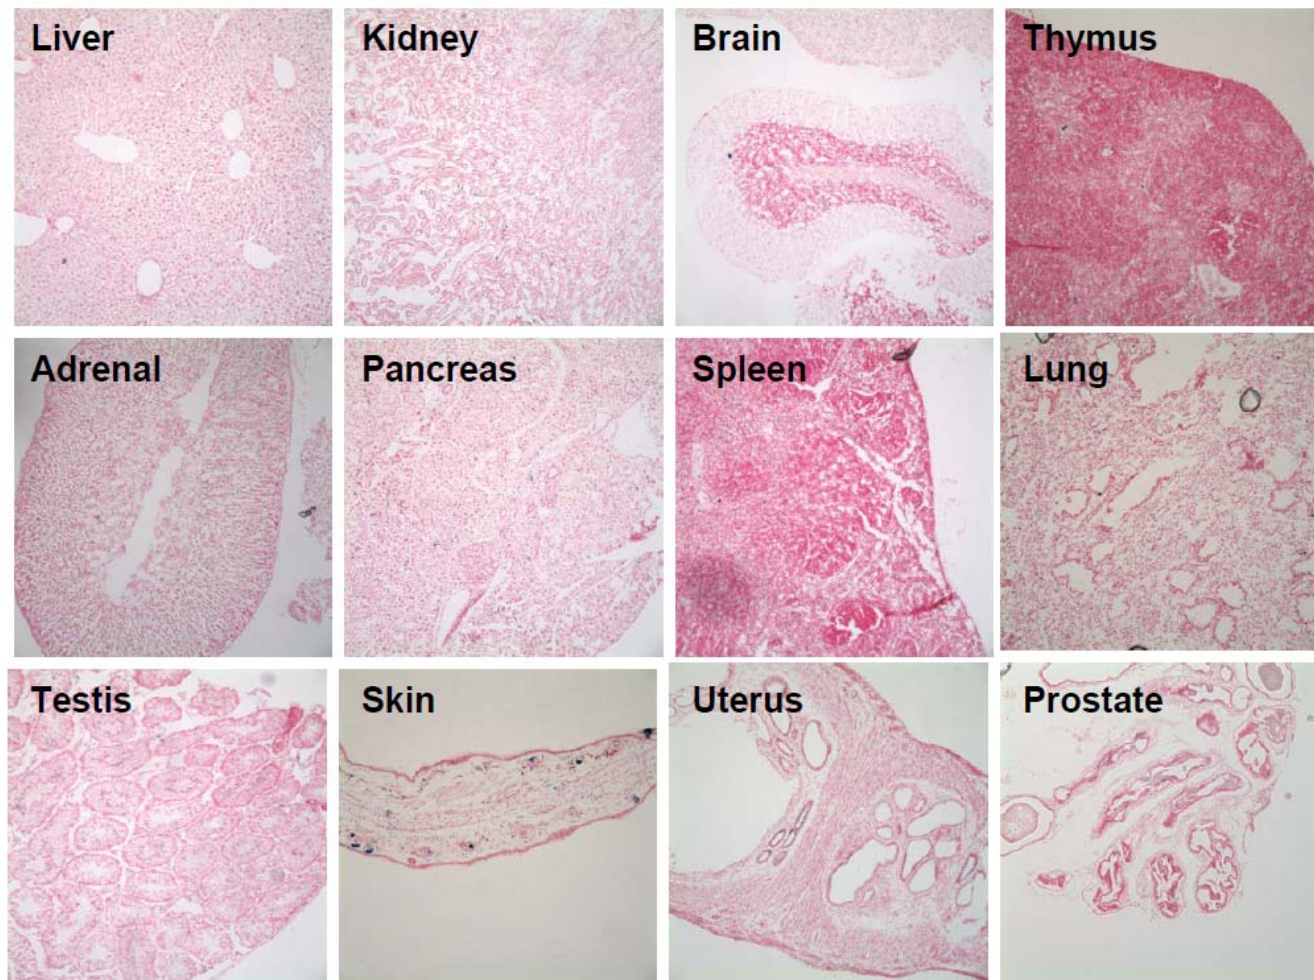

## SUPPLEMENTARY DATA

**Supplementary Figure 5.** Tissues Negative for X-gal Staining in Adiopoq-Cre R26R-lacZ Mice. Representative X-gal stained tissue sections from Adiopoq-Cre R26R-lacZ mice. Liver, kidney, brain, thymus, adrenal, pancreas, spleen, lung, testis, salivary gland, ovary, and uterus, from 6 week-old chow fed Adiopoq-Cre R26R-lacZ (n=2) were embedded in OCT; 10  $\mu$ m frozen sections were X-gal stained, and counterstained with nuclear fast red. Representative images are shown.

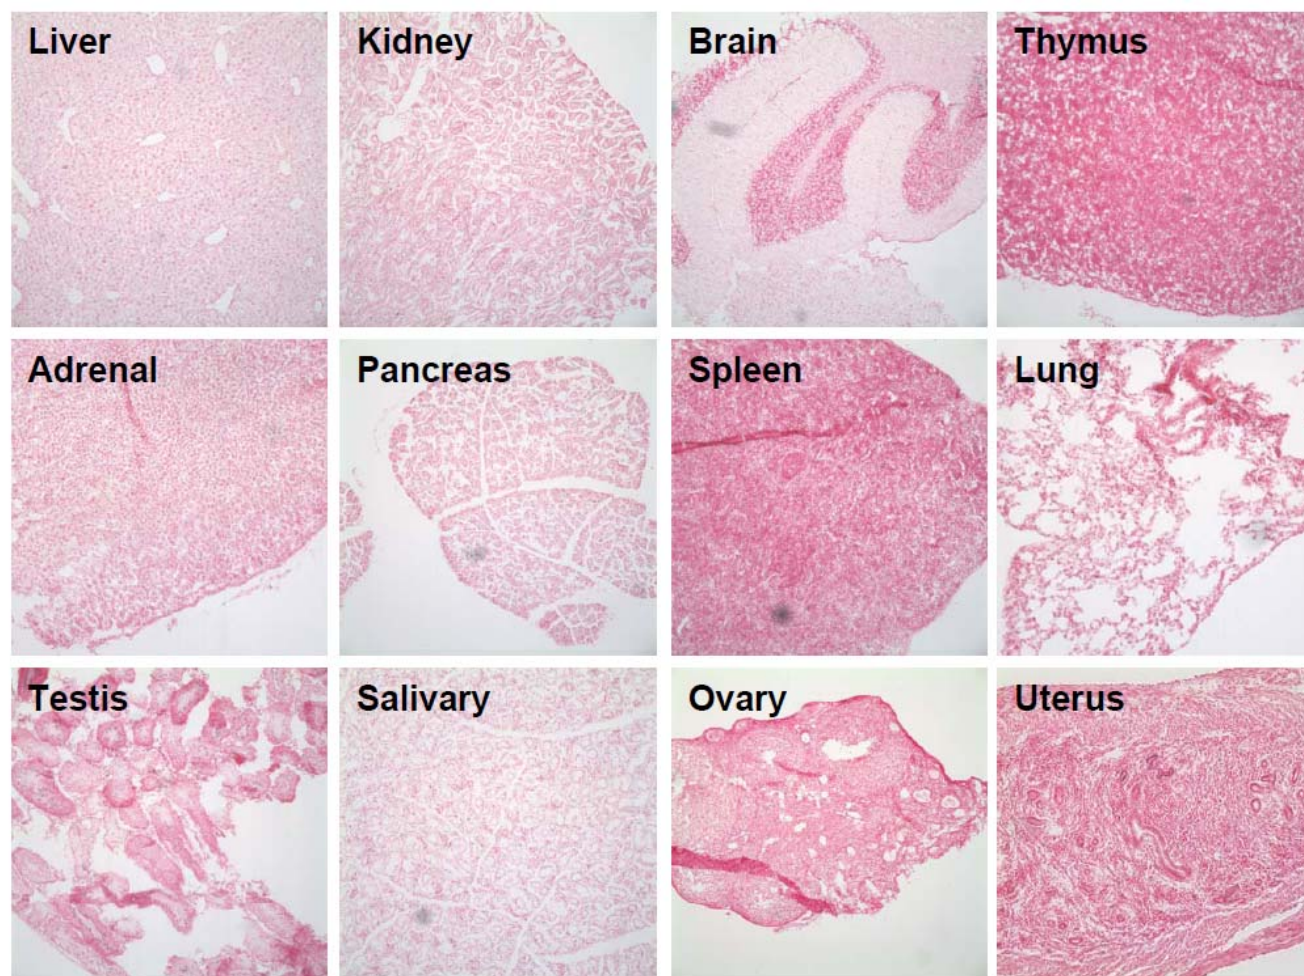

Supplement: supp_db12-1089_DB121089SupplementaryData.pdf [file supp_db12-1089_DB121089SupplementaryData.pdf]
